# Supplementary material
Source: Springer Nature journal article supplement (https://www.springermedizin.de/resource/supplementary/13256_2012_2279_MOESM2_ESM.pdf/9649346)
Supplement: MOESM2 [file 9649346]

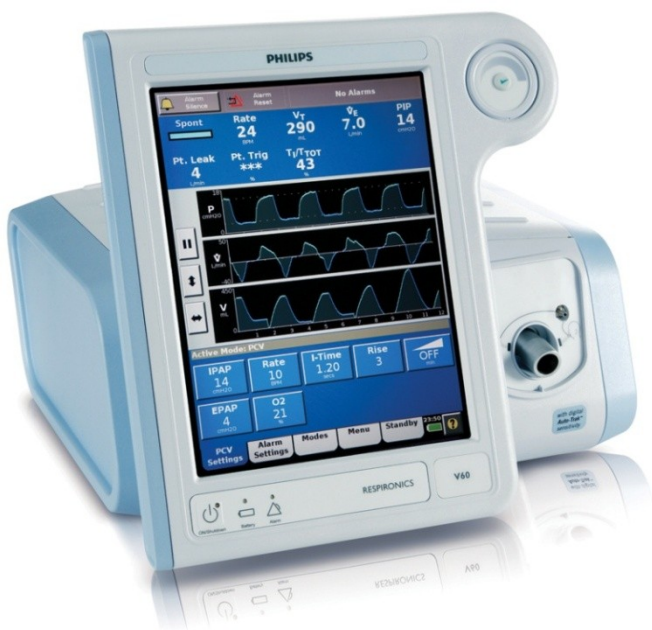

## Ventilation modes

CPAP (continuous positive airway pressure)

PCV (pressure-controlled ventilation)

ST (spontaneous/timed)

AVAPS(average volume-assured pressure support)

## Auto-Trak Sensitivity

allows the ventilator to automatically compensate for unintentional leaks by maintaining a stable baseline and adjusting trigger and cycle thresholds for optimum patient-to-ventilator synchrony.
